# Supplementary material
Source: HighWire-hosted journal article supplement (https://jnm.snmjournals.org/highwire/filestream/105319/field_highwire_adjunct_files/0/262808_Supplemental_Data.pdf)
Supplement: 262808_Supplemental_Data.pdf [file 262808_Supplemental_Data.pdf]

1 **Supplemental Table. 1.** Detailed description of anatomical locations with highest  
 2 FAPI uptake per patient for degenerative, muscle and scarring / wound healing  
 3 uptake.

|                                             | <b>No. patients</b><br>(N = 91) |
|---------------------------------------------|---------------------------------|
| <b>Bone degenerative lesions</b>            | 47                              |
| Shoulder, AC- and SC-joints                 | 17                              |
| Spine and Sacrum                            | 14                              |
| Hip joints and Pelvis                       | 12                              |
| Cranio-mandibular Joints                    | 3                               |
| Extremities (Patella)                       | 1                               |
| <b>Focal / localized muscle uptake</b>      | 26                              |
| Rotator cuff                                | 9                               |
| Autochthonous back muscles                  | 6                               |
| Neck                                        | 4                               |
| Extremities                                 | 4                               |
| Hip muscles                                 | 2                               |
| Latissimus dorsi                            | 1                               |
| <b>Scarring / Wound healing</b>             | 18                              |
| Inguinal (post cardiovascular intervention) | 9                               |
| Abdominal (laparotomy)                      | 3                               |
| thoracic                                    | 4                               |
| Head                                        | 2                               |



5 **Supplemental Table. 2.** Detailed uptake values for Ga-68-FAPI04 and Ga-68-  
 6 FAPI46 for the respective categories and background uptake values.  
 7

|                                              | SUVmax         | SUVpeak        | SUVmean        |
|----------------------------------------------|----------------|----------------|----------------|
| <b>Degenerative lesions</b>                  |                |                |                |
| Mean (SD) FAPI46                             | 7.6 (3.0)      | 4.3 (1.9)      | 4.3 (1.8)      |
| Mean (SD) FAPI04                             | 7.8 (2.7)      | 4.4 (1.3).     | 4.1 (1.8)      |
| <b>Focal or localized muscle uptake</b>      |                |                |                |
| Mean (SD) FAPI46                             | 6.1 (2.4)      | 4.3 (1.5)      | 3.8 (1.7)      |
| Mean (SD) FAPI04                             | 5.8 (1.8)      | 3.9 (1.2).     | 3.3 (1.0)      |
| <b>Scarring and wound healing</b>            |                |                |                |
| Mean (SD) FAPI46                             | 7.6 (3.1)      | 4.8 (1.8)      | 4.7 (1.9)      |
| Mean (SD) FAPI04                             | 8.1 (5.0)      | 4.9 (2.7).     | 4.2 (2.2)      |
| <b>Mammary glands</b>                        |                |                |                |
| Mean (SD) FAPI46                             | 4.4 (1.8)      | 2.5 (0.7)      | 2.6 (1.0)      |
| Mean (SD) FAPI04                             | 4.8 (0.7)      | 3.0 (1.3).     | 2.8 (0.3)      |
| <b>Uterine uptake</b>                        |                |                |                |
| Mean (SD) FAPI46                             | 13.1 (8.2)     | 10.4 (6.4)     | 8.2 (5.1)      |
| Mean (SD) FAPI04                             | 10.7 (5.5)     | 8.2 (4.4).     | 6.1 (3.8)      |
| <b>Salivary glands</b>                       |                |                |                |
| Mean (SD) FAPI46                             | 3.2 (0.2)      | 2.5 (0.1)      | 2.4 (0.1)      |
| Mean (SD) FAPI04                             | 3.1 (0.1)      | 2.4 (0.2).     | 2.0 (0.3)      |
| <b>SUV<sub>mean</sub> gluteal background</b> |                |                |                |
| Mean (SD)                                    | 1.8 (0.5)      | 1.4 (0.5)      | 1.1 (0.4)      |
| Median [Min, Max]                            | 1.8 [1.2; 3.1] | 1.3 [0.8; 2.7] | 1.0 [0.7; 2.3] |

---

**SUV<sub>mean</sub> liver background**

|                   |                |                |                |
|-------------------|----------------|----------------|----------------|
| Mean (SD)         | 1.3 (0.4)      | 1.0 (0.4)      | 0.8 (0.4)      |
| Median [Min, Max] | 1.2 [0.7; 2.3] | 0.9 [0.6; 1.7] | 0.6 [0.4; 1.6] |

**SUV<sub>mean</sub> bloodpool background**

|                   |                |                |                |
|-------------------|----------------|----------------|----------------|
| Mean (SD)         | 2.0 (0.5)      | 1.5 (0.4)      | 1.3 (0.4)      |
| Median [Min, Max] | 1.9 [1.3; 3.1] | 1.4 [1.9; 2.5] | 1.2 [0.8; 2.2] |

---
